# Supplementary material for: Rapid separation of human breast cancer cells from blood using a simple spiral channel device
Source: Royal Society of Chemistry journal article supplement (doi:10.1039/c6ay01077f), 2016-01-01
Supplement: c6ay01077f1.pdf [file c6ay01077f1.pdf]

## Electronic supplementary information

# Rapid separation of human breast cancer cells from blood using a simple spiral channel device

Di Huang<sup>a</sup>, Xin Shi<sup>b</sup>, Yi Qian<sup>b</sup>, Wenlai Tang<sup>a</sup>, Linbo Liu<sup>a</sup>, Nan Xiang<sup>\*a</sup>, and Zhonghua Ni<sup>\*a</sup>

*<sup>a</sup>School of Mechanical Engineering, Jiangsu Key Laboratory for Design and Manufacture of Micro-Nano Biomedical Instruments, Southeast University, Nanjing 211189, People's Republic of China*

*<sup>b</sup>Department of General Surgery, Zhongda Hospital, Southeast University, Nanjing 210009, People's Republic of China*

*\*Corresponding authors.*

*E-mail address: nan.xiang@seu.edu.cn (N.Xiang); nzh2003@seu.edu.cn (Z.Ni).*

**Table S1.** Concentration and volume of blood cells and MCF-7 cells collected from each outlet after first stage separation. The initial concentrations of diluted blood cells and MCF-7 were about  $5 \times 10^7$  cells/mL and  $5 \times 10^4$  cells/mL, respectively.

| Outlet | Cell Counter Channel | Measured concentration (cells/mL) |                     |                     | Average Concentration (cells/mL) | Volume (mL) | Cell number        |
|--------|----------------------|-----------------------------------|---------------------|---------------------|----------------------------------|-------------|--------------------|
|        |                      | 1                                 | 2                   | 3                   |                                  |             |                    |
| Inner  | Bright field         | $1.28 \times 10^8$                | $1.675 \times 10^8$ | $1.505 \times 10^8$ | $1.49 \times 10^8$               | 2.6mL       | $3.87 \times 10^8$ |
| Middle | Bright field         | $1.16 \times 10^7$                | $1.295 \times 10^7$ | $1.225 \times 10^7$ | $1.23 \times 10^7$               | 2.8mL       | $3.57 \times 10^7$ |
| Middle | Fluorescence         | $1.11 \times 10^5$                | $1.14 \times 10^5$  | $1.35 \times 10^5$  | $1.20 \times 10^5$               | 2.8mL       | $3.36 \times 10^5$ |
| Outer  | Bright field         | $1.135 \times 10^6$               | $1.19 \times 10^6$  | $1.16 \times 10^6$  | $1.16 \times 10^6$               | 2.5mL       | $2.90 \times 10^6$ |

In this table, we can count the total cell numbers through the bright field channel and the tumor cell numbers through the fluorescence channel. The efficiency of separation are calculated as follows:

- (1) In the inner and outer outlets, since the number of MCF-7 cells are several orders of magnitude smaller than the background cells, we can assume that the numbers of total cells are the numbers of blood cells. In the middle outlet, the number of blood cells is  $3.57 \times 10^7 - 3.36 \times 10^5 = 3.54 \times 10^7$ ;
- (2) The percentage of blood cells removed from inner and outer outlets after first stage separation:  $(3.87 \times 10^8 + 2.90 \times 10^6) / (3.87 \times 10^8 + 3.54 \times 10^7 + 2.90 \times 10^6) = 91.68\%$ ;
- (3) The recovery rate of MCF-7 cells:  $(3.36 \times 10^5) / (5 \times 10^4 / \text{mL} \times 7.9 \text{mL}) = 85.06\%$ ;
- (4) The purity of the collected MCF-7 cells:  $(3.36 \times 10^5) / (3.57 \times 10^7) = 0.94\%$ .

**Table S2.** Concentration and volume of blood cells and MCF-7 cells collected from each outlet after second stage separation.

| Outlet | Cell Counter Channel | Measured concentration (cells/mL) |                     |                     | Average Concentration (cells/mL) | Volume (mL) | Cell number        |
|--------|----------------------|-----------------------------------|---------------------|---------------------|----------------------------------|-------------|--------------------|
|        |                      | 1                                 | 2                   | 3                   |                                  |             |                    |
| Inner  | Bright field         | $3.685 \times 10^7$               | $3.095 \times 10^7$ | $3.335 \times 10^7$ | $3.37 \times 10^7$               | 0.6mL       | $2.02 \times 10^7$ |
| Middle | Bright field         | $3.33 \times 10^6$                | $3.125 \times 10^6$ | $3.18 \times 10^6$  | $3.21 \times 10^6$               | 0.9mL       | $2.89 \times 10^6$ |
| Middle | Fluorescence         | $3.66 \times 10^5$                | $1.91 \times 10^5$  | $2.23 \times 10^5$  | $2.60 \times 10^5$               | 0.9mL       | $2.34 \times 10^5$ |
| Outer  | Bright field         | $2.465 \times 10^5$               | $1.995 \times 10^5$ | $2.55 \times 10^5$  | $2.34 \times 10^5$               | 0.7mL       | $1.64 \times 10^5$ |

As the same, we can count the total cell numbers through the bright field channel and the tumor cell numbers through the fluorescence channel through this table. The efficiency of separation are calculated as follows:

- (1) In the inner and outer outlets, since the number of MCF-7 cells are several orders of magnitude smaller than the background cells, we can assume that the numbers of total cells are the numbers of blood cells. In the middle outlet, the number of blood cells is  $2.89 \times 10^6 - 2.34 \times 10^5 = 2.66 \times 10^6$ ;
- (2) The percentage of blood cells removed from inner and outer outlets in the second stage separation:  $(2.02 \times 10^7 + 1.64 \times 10^5) / (2.02 \times 10^7 + 2.66 \times 10^6 + 1.64 \times 10^5) = 88.45\%$ ;
- (3) Ignore the sample loss, the percentage of blood cells removed after first and second stage separation:  $91.68\% + (1 - 91.68\%) \times 88.45\% = 99.04\%$ ;
- (4) Ignore the sample loss, the recovery rate of MCF-7 cells after first and second stage separation:  $85.06\% \times (2.34 \times 10^5 / 2.2 \times 2.8) / (3.3^6 \times 10^5) = 75.40\%$ ;
- (5) The purity of the collected MCF-7 cells after two stage separation:  $(2.34 \times 10^5) / (2.89 \times 10^6) = 8.1\%$ ;
- (6) The enrichment factor of MCF-7 cells at the middle outlet after two stage separation:  $8.1\% / 0.1\% = 81$ .

**Table S3.** Concentration and volume of WBCs and MCF-7 cells collected from each outlet after separation. The initial concentrations of lysed buffy coat and MCF-7 were about  $5 \times 10^6$  cells/mL and  $5 \times 10^4$  cells/mL, respectively.

| Outlet | Cell Counter Channel | Measured concentration (cells/mL) |                     |                     | Average Concentration (cells/mL) | Volume (mL) | Cell number        |
|--------|----------------------|-----------------------------------|---------------------|---------------------|----------------------------------|-------------|--------------------|
|        |                      | 1                                 | 2                   | 3                   |                                  |             |                    |
| Inner  | Bright field         | $0.975 \times 10^7$               | $1.005 \times 10^7$ | $1.05 \times 10^7$  | $1.01 \times 10^7$               | 1.4mL       | $1.41 \times 10^7$ |
| Inner  | Fluorescence         | $2.35 \times 10^4$                | $1.76 \times 10^4$  | $1.47 \times 10^4$  | $1.86 \times 10^4$               | 1.4mL       | $2.60 \times 10^4$ |
| Middle | Bright field         | $3.625 \times 10^6$               | $3.98 \times 10^6$  | $4.235 \times 10^6$ | $3.95 \times 10^6$               | 1.5mL       | $5.93 \times 10^6$ |
| Middle | Fluorescence         | $1.29 \times 10^5$                | $1.32 \times 10^5$  | $1.41 \times 10^5$  | $1.34 \times 10^5$               | 1.5mL       | $2.01 \times 10^5$ |
| Outer  | Bright field         | $2.26 \times 10^5$                | $3.14 \times 10^5$  | $2.755 \times 10^5$ | $2.72 \times 10^5$               | 1.5mL       | $4.08 \times 10^5$ |
| Outer  | Fluorescence         | 0                                 | $2.93 \times 10^3$  | 0                   | $0.98 \times 10^3$               | 1.5mL       | $1.47 \times 10^3$ |

In this table, we can also count the total cell numbers through the bright field channel and the tumor cell numbers through the fluorescence channel. The efficiency of separation are calculated as follows:

- (1) In the inner outlet, since the number of MCF-7 cells are three orders of magnitude smaller than the WBCs, we can assume that the numbers of total cells are the numbers of WBCs. In the middle and outer outlets, the number of WBCs are  $5.93 \times 10^6 - 2.01 \times 10^5 = 2.73 \times 10^6$  and  $4.08 \times 10^5 -$

$1.47 \times 10^3 = 4.07 \times 10^5$ , respectively.

(2) The percentage of WBCs removed from inner and outer outlets after separation:

$$(1.41 \times 10^7 + 4.07 \times 10^5) / (1.41 \times 10^7 + 5.73 \times 10^6 + 4.07 \times 10^5) = 71.69\%;$$

(3) The recovery rate of MCF-7:  $2.01 \times 10^5 / (2.60 \times 10^4 + 2.01 \times 10^5 + 1.47 \times 10^3) = 87.98\%$ ;

(4) The purity of the collected MCF-7 cells:  $(2.01 \times 10^5) / (5.93 \times 10^6) = 3.39\%$ ;

(5) The enrichment factor of MCF-7 cells:  $3.39\% / 1\% = 3.39$ .

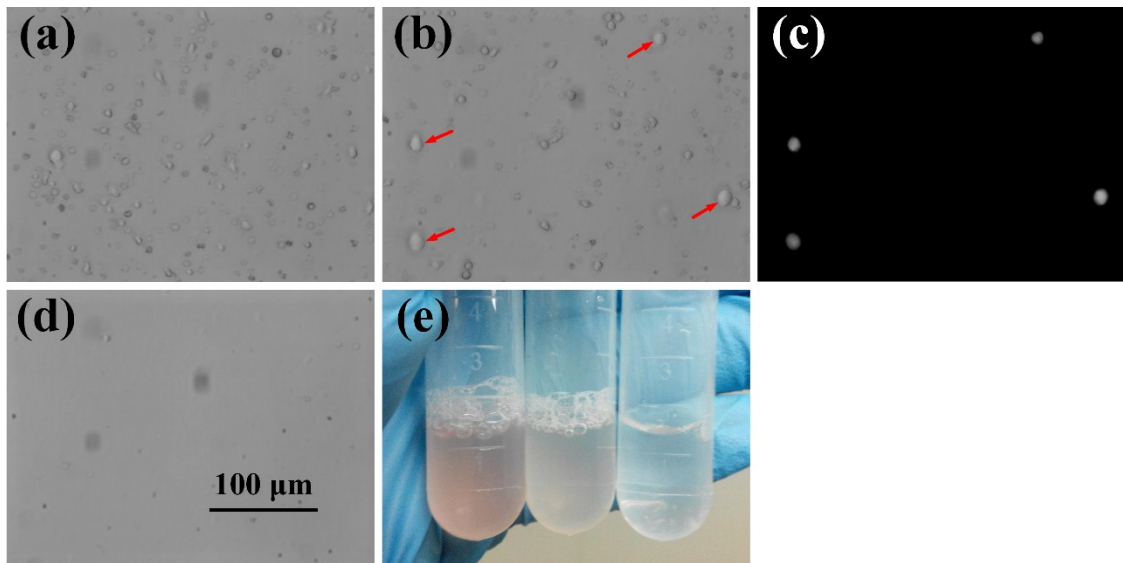

**Fig. S1.** The separation of WBCs and MCF-7 cells whose initial concentrations are about  $5 \times 10^6$  cells/mL and  $5 \times 10^4$  cells/mL respectively. The Figure is combined with the microscopic images of samples collected from (a) inner outlet under bright field, (b) middle outlet under bright field, (c) middle outlet in fluorescence mode and (d) outer outlet. (e) Photographs of samples collected from each outlet.

**Table S4.** Concentration and volume of WBCs and MCF-7 cells collected from each outlet after separation. The initial concentrations of lysed blood cells and MCF-7 were about  $5 \times 10^6$  cells/mL and 500 cells/mL, respectively.

| Outlet | Cell Counter Channel | Measured concentration (cells/mL) |                     |                    | Average Concentration (cells/mL) | Volume (mL) | Cell number        |
|--------|----------------------|-----------------------------------|---------------------|--------------------|----------------------------------|-------------|--------------------|
|        |                      | 1                                 | 2                   | 3                  |                                  |             |                    |
| Inner  | Bright field         | $1.04 \times 10^7$                | $1.125 \times 10^7$ | $1.18 \times 10^7$ | $1.12 \times 10^7$               | 1.0mL       | $1.12 \times 10^7$ |
| Inner  | Fluorescence         | $1.47 \times 10^4$                | $1.17 \times 10^4$  | $2.64 \times 10^4$ | $1.76 \times 10^4$               | 13 $\mu$ L  | 228.8              |
| Middle | Bright field         | $3.745 \times 10^6$               | $3.935 \times 10^6$ | $4.04 \times 10^6$ | $3.91 \times 10^6$               | 1.3mL       | $5.08 \times 10^6$ |
| Middle | Fluorescence         | $3.05 \times 10^5$                | $2.43 \times 10^5$  | $1.06 \times 10^5$ | $2.18 \times 10^5$               | 10 $\mu$ L  | 2180               |
| Outer  | Bright field         | $1.495 \times 10^5$               | $1.145 \times 10^5$ | $1.32 \times 10^5$ | $1.32 \times 10^5$               | 1.2mL       | $1.58 \times 10^5$ |
| Outer  | Fluorescence         | 0                                 | 0                   | 0                  | 0                                | 10 $\mu$ L  | 0                  |

In this experiment, since the number of MCF-7 cells were extremely low in the collected samples while the concentration can be counted by the Cell Counter is at least  $1 \times 10^4$  cells/mL, we have to concentrate the collected samples to a very small volume by the centrifugation. This may lead to a relatively large measurement error. However, we can still capture the most of tumor cells from the middle outlet (see Fig S2 (d) and (e)) in the case that there are very rare tumor cells in the initial sample. The result shows that our device have a great potential for biomedical and clinical applications.

By the way, the percentage of WBCs removed from inner and outer outlets after separation is  $(1.12 \times 10^7 + 1.58 \times 10^5) / (1.12 \times 10^7 + 5.08 \times 10^6 + 1.58 \times 10^5) = 69.10\%$ , which is close to 71.69% calculated from the separation experiments with larger concentrations of MCF-7 cells.

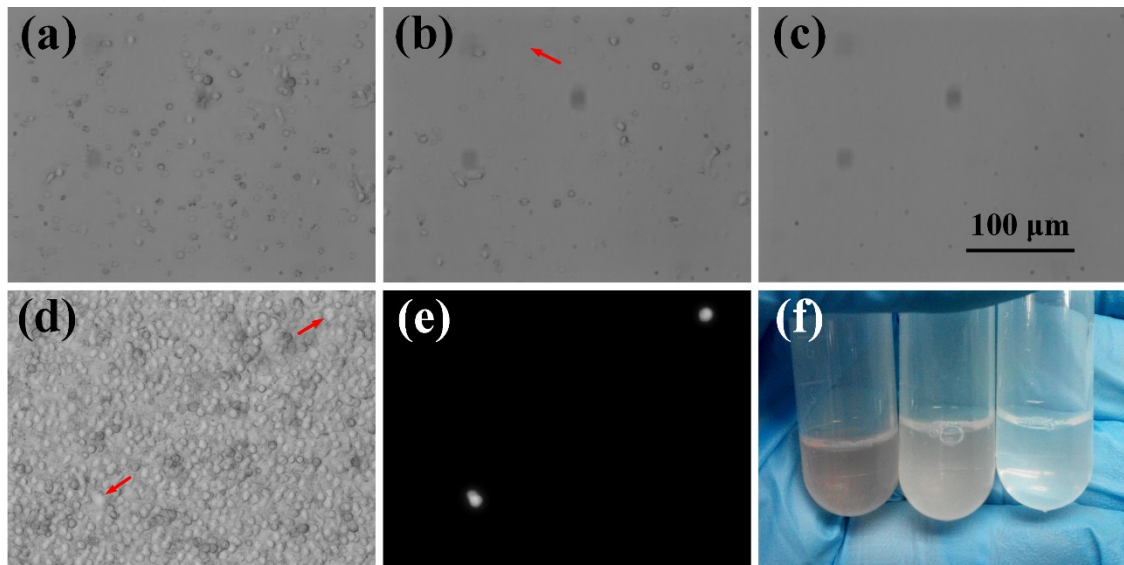

**Fig. S2.** The separation of WBCs and MCF-7 cells whose concentrations were  $5 \times 10^6$  cells/mL and 500 cells/mL respectively. The Figure is combined with microscopic images of samples collected from (a) inner outlet, (b) middle outlet and (c) middle outlet under bright field. To determine the separation performance, sample collected from middle outlet was concentrated by centrifugation to 10  $\mu$ L. Images taken (d) under bright field and (e) in fluorescence mode show that the stained tumors cells still can be detected. (f) Photographs of samples collected from each outlet.
